# Supplementary material
Source: PubMed Central journal article supplement (PMC7042945)
Supplement: jamaophthalmol-138-365-s002.pdf [file jamaophthalmol-138-365-s002.pdf]

## Data Sharing Statement

Lambert. Long-term Effect of Intraocular Lens vs Contact Lens Correction on Visual Acuity After Cataract Surgery During Infancy. *JAMA Ophthalmol*. Published February 20, 2020. 10.1001/jamaophthalmol.2020.0006

### Data

**Data available:** No

### Additional Information

**Explanation for why data not available:** Data is on Children and PHI needs to be protected.
